# Supplementary material for: Von Hippel-Lindau (VHL) Inactivation in Sporadic Clear Cell Renal Cancer: Associations with Germline VHL Polymorphisms and Etiologic Risk Factors
Source: PLoS Genet. 2011 Oct 13;7(10):e1002312. doi: 10.1371/journal.pgen.1002312 (PMC3192834; doi:10.1371/journal.pgen.1002312)
Supplement: Table S2 — Univariate analysis of von Hippel-Lindau inactivating alterations associated with patient descriptive and clinical characteristics in clear cell RCC cases. (XLS) [file pgen.1002312.s002.xls]

## Sheet: Figure 1
Figure 1. Comparison of mutation and promoter methylation prevalence among all cases, RCC, and histologically confirmed ccRCC
						All Alterations	Functional Alterations
					Original Diagnosis	0.82	0.71
					Confirmed Renal Cell Carcinoma	0.83	0.73
					Confirmed Clear Cell Renal Carcinoma	0.883	0.78

## Sheet: Table_Supl 2
Table S2. Univariate analysis of von Hippel-Lindau inactivating alterations associated with patient descriptive and clinical characteristics in clear cell RCC cases
Case Characteristics		All ccRCC Cases1	%	Methylated	%	Cases w/Alteration2	%	>1 Alteration2	%	Exon 14	%	Exon 24	%	Exon 34	%
Pathology	Total	470	100	41	8.7234	366	77.8723	16	3.40426	141	39.8305	115	32.4859	98	27.6836
Stage	T1	89	19.3059	7	7.86517	71	79.7753	4	4.49438	30	41.6667	29	40.2778	13	18.0556
	T2	224	48.59	25	11.1607	169	75.4464	4	1.78571	61	38.6076	45	28.481	52	32.9114
	T3/T4	148	32.1041	8	5.40541	120	81.0811	8	5.40541	48	40.3361	39	32.7731	32	26.8908
p-trend				0.255		0.641		0.482		0.953		0.512		0.503
Fuhrman	I	2	0.43573	1	50	0	0	0	0	0	0	0	0	0	0
Nuclear Grade	II	344	74.9455	33	9.59302	269	78.1977	10	2.90698	103	39.9225	82	31.7829	73	28.2946
	III/IV	113	24.6187	6	5.30973	88	77.8761	4	3.53982	34	40	27	31.7647	24	28.2353
p-trend				0.439		0.67		0.704		0.947		0.714		0.968
Node	N0	370	90.6863	32	8.64865	286	77.2973	10	2.7027	119	42.9603	87	31.4079	71	25.6318
	N1	21	5.14706	1	4.7619	20	95.2381	3	14.2857	6	27.2727	7	31.8182	9	40.9091
	N2/N3	17	4.2	2	11.7647	9	52.9412	0	0	2	28.5714	2	28.5714	3	42.8571
p-trend				0.962		0.278		0.457		0.201		0.977		0.127
Metastasis	Unknown	61	13.7079	5	8.19672	48	78.6885	3	4.91803	15	31.25	19	39.5833	14	29.1667
	None (M0)	362	81.3483	32	8.83978	281	77.6243	10	2.76243	118	43.3824	85	31.25	69	25.3676
	Yes (M1)	22	4.94382	1	4.54545	18	81.8182	2	9.09091	2	11.7647	6	35.2941	9	52.9412
p-value3				0.568		0.645		0.098		0.018		0.502		0.079
Patient Characteristics
Age Group	<50 years	81	17.234	6	7.40741	62	76.5432	3	3.7037	19	32.7586	20	34.4828	19	32.7586
	>50 years	389	82.766	35	8.99743	304	78.1491	13	3.3419	122	41.2162	95	32.0946	79	26.6892
p-trend				0.889		0.751		0.87		0.274		0.603		0.303
Sex	Male	285	60.6383	21	7.36842	221	77.5439	8	2.80702	82	39.0476	74	35.2381	54	25.7143
	Female	185	39.3617	20	10.8108	145	78.3784	8	4.32432	59	40.9722	41	28.4722	44	30.5556
p-value				0.277		0.831		0.375		0.564		0.362		0.421
High Blood Pressure	Yes	210	44.6809	22	10.4762	161	76.6667	7	3.33333	59	38.0645	48	30.9677	48	30.9677
	No	260	55.3191	19	7.30769	205	78.8462	9	3.46154	82	41.206	67	33.6683	50	25.1256
p-value				0.156		0.571		0.939		0.515		0.734		0.208
Body Mass Index	<25	123	26.226	12	9.7561	98	79.6748	2	1.62602	36	39.5604	34	37.3626	21	23.0769
	25-35	318	67.8038	28	8.80503	245	77.044	14	4.40252	97	40.249	76	31.5353	68	28.2158
	35+	28	5.97015	1	3.57143	22	78.5714	0	0	8	36.3636	5	22.7273	9	40.9091
p-trend				0.363		0.707		0.567		0.922		0.148		0.066
Tobacco Smoking	Never	211	45.0855	17	8.05687	172	81.5166	8	3.79147	66	38.8235	49	28.8235	55	32.3529
	Former	106	22.6496	10	9.43396	82	77.3585	4	3.77358	38	48.1013	26	32.9114	15	18.9873
	Current	151	32.265	14	9.27152	110	72.8477	4	2.64901	36	34.9515	40	38.835	27	26.2136
p-trend				0.706		0.05		0.569		0.649		0.114		0.192
Family History of Kidney	No	308	65.5319	30	9.74026	234	75.974	11	3.57143	93	40.7895	78	34.2105	57	25
Cancer 5,6	Yes	12	2.55319	1	8.33333	8	66.6667	0	0	1	12.5	3	37.5	4	50
p-value				0.467		0.461		0.505		0.107		0.857		0.143
Family History of Cancer 5,6	Yes-other	150	31.9149	10	6.66667	124	82.6667	5	3.33333	47	39.8305	34	28.8136	37	31.3559
p-value				0.118		0.104		0.896		0.908		0.338		0.492
Vegetable Intake	Low	137	30.3769	10	7.29927	104	75.9124	1	0.729927	40	42.5532	27	28.7234	27	28.7234
Frequency Tertile	Medium	189	41.9069	20	10.582	149	78.836	7	3.7037	57	38.7755	50	34.0136	40	27.2109
	High	125	27.7162	10	8	98	78.4	7	5.6	37	37.3737	33	33.3333	29	29.2929
p-trend				0.29		0.48		0.02		0.55		0.53		0.87
Fruit Intake	Low	132	29.3333	15	11.3636	96	72.7273	5	3.78788	40	43.956	23	25.2747	28	30.7692
Frequency Tertile	Medium	167	37.1111	17	10.1796	133	79.6407	3	1.79641	51	42.8571	41	34.4538	27	22.6891
	High	151	33.5556	8	5.29801	121	80.1325	7	4.63576	38	32.4786	41	35.0427	38	32.4786
p-trend				0.09		0.14		0.65		0.11		0.12		0.6
Alcohol Intake	None	120	25.7511	10	8.33333	96	80	7	5.83333	33	36.2637	31	34.0659	27	29.6703
Frequency	Low	145	31.1159	19	13.1034	110	75.8621	3	2.06897	41	38.6792	33	31.1321	32	30.1887
	Medium	118	25.3219	10	8.47458	84	71.1864	2	1.69492	31	41.8919	25	33.7838	18	24.3243
	High	83	17.8112	4	4.81928	68	81.9277	2	2.40964	27	42.1875	18	28.125	19	29.6875
p-trend				0.26		0.84		0.13		0.5		0.45		0.64
Occupational Exposures
Organic Solvents	Unexposed	271	69.3095	22	8.11808	212	78.2288	8	2.95203	71	36.0406	67	34.0102	59	29.9492
	Exposed	120	30.6905	8	6.66667	97	80.8333	5	4.16667	40	40	35	35	25	25
P-value				0.712		0.56		0.54		0.48		0.93		0.63
Chlorinated Solvents	Unexposed	346	88.491	26	7.51445	273	78.9017	10	2.89017	93	35.7692	92	35.3846	75	28.8462
	Exposed	45	11.509	4	8.88889	36	80	3	6.66667	18	48.6486	10	27.027	9	24.3243
P-value				0.816		0.865		0.184		0.122		0.486		0.757
TCE7	Unexposed	360	92.0716	26	7.22222	286	79.4444	13	3.61111	102	37.2263	95	34.6715	77	28.1022
	Exposed	31	7.92839	4	12.9032	23	74.1935	0	0	9	39.1304	7	30.4348	7	30.4348
P-value				0.272		0.491		0.282		0.903		0.65		0.85
1Subgroups that do not add to 470 are due to missing clinical or risk factor information
2Genetic inactivating alterations include deletions, insertions, missense, nonsense, splicing, and 3'UTR.
3p-value for comparison of M0 vs M1 only
4Calculation based on total number of genetic alterations per exon
5Both groups are compared to cases without a family history of cancer
6Self-report having a first degree relative with cancer or kidney cancer
7Ever occupationally exposed to trichloroethylene
